# Supplementary material
Source: publisher figshare collection journal article supplement (https://acs.figshare.com/ndownloader/files/4598236)
Supplement: Supplementary file 1 [file 4598236]

Supporting Information

to

pH Effects on Iron-Catalyzed Oxidation using

Fenton's Reagent

*Christopher K. Duesterberg<sup>1</sup>, Steven E. Mylon<sup>2</sup> and T. David Waite<sup>1</sup>*

<sup>1</sup>School of Civil and Environmental Engineering, The University of New South Wales  
Sydney, NSW 2052, Australia

<sup>2</sup>Department of Chemistry, Lafayette College, Easton, PA 18042

Revised Version Submitted

Environmental Science & Technology

August 2008

---

Corresponding author: Phone +61-2-9385 5060, Fax +61-2-9385 6139, Email

d.waite@unsw.edu.au

## Mathematical Justification of Use of Scavenging Factor, $\Theta$

Key reactions relating to Fenton-mediated hydroxyl radical production and consumption by both target formic acid (HCOOH) and a scavenger (Scav) that competes with formic acid for hydroxyl radicals can be written:

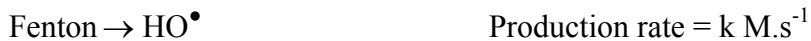

where production rate can be assumed constant for any given pH,  $[\text{Fe}]_T$ ,  $[\text{HCOOH}]_T$  and  $[\text{H}_2\text{O}_2]_T$

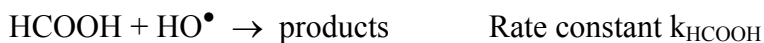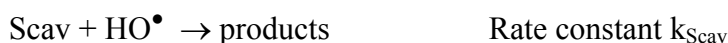

Rate expressions for these reactions can be written as:

$$\frac{d[\text{HCOOH}]}{dt} = -k_{\text{HCOOH}}[\text{HCOOH}][\text{HO}^\bullet]$$

$$\frac{d[\text{Scav}]}{dt} = -k_{\text{Scav}}[\text{Scav}][\text{HO}^\bullet]$$

$$\frac{d[\text{HO}^\bullet]}{dt} = k - k_{\text{HCOOH}}[\text{HCOOH}][\text{HO}^\bullet] - k_{\text{Scav}}[\text{Scav}][\text{HO}^\bullet]$$

Since  $\text{HO}^\bullet$  is both produced and consumed in these reactions, it will reach a steady state concentration,  $[\text{HO}^\bullet]_{ss}$  thus

$$\frac{d[\text{HO}^\bullet]_{ss}}{dt} = 0 = k - k_{\text{HCOOH}}[\text{HCOOH}][\text{HO}^\bullet]_{ss} - k_{\text{Scav}}[\text{Scav}][\text{HO}^\bullet]_{ss}$$

$$\text{where } [\text{HO}^\bullet]_{ss} = \frac{k}{k_{\text{HCOOH}}[\text{HCOOH}] + k_{\text{Scav}}[\text{Scav}]}$$

Obviously, if no scavenger had been present,

$$[\text{HO}^\bullet]_{ss}^{\text{No Scav}} = \frac{k}{k_{\text{HCOOH}}[\text{HCOOH}]}$$

Thus, a rate expression for the degradation of HCOOH that accounts for the presence of a scavenger but is expressed in scavenger free terms can be written as:

$$\begin{aligned}
\frac{d[\text{HCOOH}]}{dt} &= - \left( \frac{[\text{HO}^\bullet]_{ss}}{[\text{HO}^\bullet]_{ss}^{\text{No Scav}}} \right) k_{\text{HCOOH}} [\text{HCOOH}] [\text{HO}^\bullet]_{ss}^{\text{No Scav}} \\
&= - \left( \frac{k_{\text{HCOOH}} [\text{HCOOH}]}{k_{\text{HCOOH}} [\text{HCOOH}] + k_{\text{Scav}} [\text{Scav}]} \right) k_{\text{HCOOH}} [\text{HCOOH}] [\text{HO}^\bullet]_{ss}^{\text{No Scav}} \\
&= - \Theta k_{\text{HCOOH}} [\text{HCOOH}] [\text{HO}^\bullet]_{ss}^{\text{No Scav}}
\end{aligned}$$

$$\text{where } \Theta = \frac{k_{\text{HCOOH}} [\text{HCOOH}]}{k_{\text{HCOOH}} [\text{HCOOH}] + k_{\text{Scav}} [\text{Scav}]}$$
